# Supplementary material for: The Economics of Attribute-Based Regulation: Theory and Evidence from Fuel Economy Standards
Source: Atypon-hosted journal article supplement (doi:10.1162/rest_a_00704), 2017-08-11
Supplement: REST_a_00704-esupp.pdf [file REST_a_00704-esupp.pdf]

 

Loading...
